# Supplementary material for: Necesito dinero para un piso
Source: Springer Nature journal article supplement (doi:10.1186/s12967-018-1762-6), 2008-01-01

Supplementary materials for

## **Identification of a Serum-based miRNA Signature for Response of Esophageal Squamous Cell Carcinoma to Neoadjuvant Chemotherapy**

Authors:

Yukiko Niwa\*; Suguru Yamada<sup>†</sup>; Fuminori Sonohara\*; Keisuke Kurimoto; Masamichi Hayashi; Mitsuru Tashiro; Naoki Iwata; Mitsuro Kanda; Chie Tanaka; Daisuke Kobayashi; Goro Nakayama; Masahiko Koike; Michitaka Fujiwara; and Yasuhiro Kodera

Contents:

[Supplementary table S1.](#)

Pathological criteria for the effects of chemotherapy.

[Supplementary table S2.](#)

The TaqMan® Assays used in this study.

[Supplementary table S3.](#)

Differentially expressed miRNA between responder and non-responder to neoadjuvant chemotherapy.

[Supplementary figure S1.](#)

Correlation analysis of expression levels of 62 miRNAs differentially expressed between responders to non-responders to neoadjuvant chemotherapy.

**Supplementary table S1.** Pathological criteria for the effects of chemotherapy.

|         |                      |                                                                                                                                                                                                                                   |
|---------|----------------------|-----------------------------------------------------------------------------------------------------------------------------------------------------------------------------------------------------------------------------------|
| Grade 0 | Ineffective          | No recognizable cytological or histological therapeutic effect.                                                                                                                                                                   |
| Grade 1 | Slightly effective   | Apparently viable cancer cells (including cells having eosinophilic cytoplasm with vacuolation and swollen nuclei) account for 1/3 or more of tumor tissue, but there is some evidence of degeneration of cancer tissue or cells. |
|         |                      | a. Viable cancer cells accounting for 2/3 or more tumor tissue.<br>b. Viable cancer cells accounting for 1/3 or more, but less than 2/3, of tumor tissue.                                                                         |
| Grade 2 | Moderately effective | Viable cancer cells account for less than 1/3 of tumor tissue, while other cancer cells are severely degenerated or necrotic.                                                                                                     |
| Grade 3 | Markedly effective   | No viable cancer cells are evident.                                                                                                                                                                                               |

**Supplementary table S2.** The TaqMan® Assays used in this study.

| Assay name     | Assay ID   | miRBase (v21) accession number | Chromosome location                             | Mature miRNA sequence  |
|----------------|------------|--------------------------------|-------------------------------------------------|------------------------|
| hsa-miR-23a*   | 002439     | MI0000079                      | Chr.19: 13836587 - 13836659 [-] on Build GRCh38 | GGGGUCCUGGGGAUGGGAUUU  |
| hsa-miR-193b*  | 002366     | MI0003137                      | Chr.16: 14303967 - 14304049 [+] on Build GRCh38 | CGGGGUUUUGAGGGCGAGAUGA |
| hsa-miR-873-3p | 470641_mat | MI0005564                      | Chr.9: 28888879 - 28888955 [-] on Build GRCh38  | GGAGACUGAUGAGUUCCCGGA  |
| hsa-miR-16     | 000391     | MI0000070                      | Chr.13: 50048973 - 50049061 [-] on Build GRCh38 | UAGCAGCACGUAAAUUUGGCG  |

**Supplementary table S3.** Differentially expressed miRNA between responder and non-responder to neoadjuvant chemotherapy.

| Name             | ID           | Value after global normalization |         |         |         |               |          |         |         | Average |          | Log <sub>2</sub> (N/R) | P-value |
|------------------|--------------|----------------------------------|---------|---------|---------|---------------|----------|---------|---------|---------|----------|------------------------|---------|
|                  |              | Responder                        |         |         |         | Non-responder |          |         |         | R       | NR       |                        |         |
| hsa-miR-3185     | MIMAT0015065 | 241.27                           | 234.53  | 223.48  | 194.11  | 474.85        | 531.71   | 428.14  | 546.05  | 223.35  | 495.19   | 1.14869                | 0.00004 |
| hsa-miR-4638-5p  | MIMAT0019695 | 83.25                            | 72.53   | 105.84  | 70.57   | 380.63        | 365.43   | 248.21  | 301.53  | 83.05   | 323.95   | 1.96373                | 0.00006 |
| hsa-miR-1236-5p  | MIMAT0022945 | 47.92                            | 33.51   | 37.58   | 44.93   | 195.50        | 233.19   | 171.39  | 126.63  | 40.99   | 181.68   | 2.14817                | 0.00007 |
| hsa-miR-193b-5p  | MIMAT0004767 | 40.76                            | 40.36   | 29.95   | 28.82   | 91.08         | 128.92   | 106.04  | 93.11   | 34.97   | 104.79   | 1.58309                | 0.00011 |
| hsa-miR-4451     | MIMAT0018973 | 8.43                             | 7.96    | 8.84    | 6.39    | 18.10         | 18.79    | 14.89   | 15.94   | 7.91    | 16.93    | 1.09859                | 0.00014 |
| hsa-miR-6895-5p  | MIMAT0027690 | 79.56                            | 70.56   | 60.46   | 69.22   | 483.07        | 1274.79  | 862.17  | 359.90  | 69.95   | 744.98   | 3.41285                | 0.00024 |
| hsa-miR-7641     | MIMAT0029782 | 80.03                            | 44.51   | 114.02  | 110.17  | 998.11        | 1561.06  | 967.28  | 501.71  | 87.18   | 1007.04  | 3.52996                | 0.00027 |
| hsa-miR-6820-5p  | MIMAT0027540 | 286.87                           | 206.12  | 225.36  | 246.06  | 489.03        | 750.23   | 506.99  | 531.92  | 241.10  | 569.54   | 1.24017                | 0.00041 |
| hsa-miR-873-3p   | MIMAT0022717 | 41.06                            | 21.49   | 16.67   | 21.12   | 122.01        | 155.17   | 104.80  | 85.61   | 25.09   | 116.90   | 2.22035                | 0.00048 |
| hsa-miR-4486     | MIMAT0019020 | 303.80                           | 202.35  | 294.93  | 251.14  | 484.92        | 662.59   | 541.60  | 515.16  | 263.05  | 551.06   | 1.06686                | 0.00065 |
| hsa-miR-3150b-5p | MIMAT0019226 | 26.14                            | 18.17   | 14.27   | 16.03   | 49.49         | 74.14    | 44.14   | 65.44   | 18.65   | 58.30    | 1.64417                | 0.00067 |
| hsa-miR-4746-3p  | MIMAT0019881 | 265.60                           | 174.40  | 165.05  | 191.50  | 410.45        | 565.53   | 372.04  | 479.04  | 199.14  | 456.77   | 1.19771                | 0.00101 |
| hsa-miR-4435     | MIMAT0018951 | 21.50                            | 26.21   | 18.66   | 21.54   | 73.07         | 146.96   | 58.04   | 62.87   | 21.98   | 85.24    | 1.95558                | 0.00118 |
| hsa-miR-6499-5p  | MIMAT0025450 | 11.06                            |         | 10.57   | 12.80   | 20.56         | 29.77    | 27.39   | 21.49   | 11.48   | 24.80    | 1.11168                | 0.00130 |
| hsa-miR-423-5p   | MIMAT0004748 | 215.41                           | 146.10  | 231.37  | 198.32  | 545.06        | 452.18   | 331.85  | 456.94  | 197.80  | 446.51   | 1.17466                | 0.00134 |
| hsa-miR-4443     | MIMAT0018961 | 340.43                           | 179.68  | 282.88  | 206.36  | 664.80        | 926.35   | 588.49  | 583.25  | 252.34  | 690.72   | 1.45275                | 0.00135 |
| hsa-miR-6798-5p  | MIMAT0027496 | 3037.71                          | 2310.11 | 1951.95 | 1934.65 | 4274.11       | 6667.55  | 4934.52 | 4406.35 | 2308.61 | 5070.63  | 1.13514                | 0.00169 |
| hsa-miR-23a-5p   | MIMAT0004496 | 32.30                            | 32.19   | 17.46   | 20.04   | 66.83         | 77.44    | 59.76   | 51.32   | 25.50   | 63.84    | 1.32406                | 0.00203 |
| hsa-miR-5739     | MIMAT0023116 | 164.24                           | 107.81  | 166.45  | 154.89  | 402.83        | 388.64   | 257.48  | 276.73  | 148.35  | 331.42   | 1.15969                | 0.00204 |
| hsa-miR-4448     | MIMAT0018967 | 107.52                           | 136.81  | 64.41   | 88.62   | 418.73        | 202.11   | 217.65  | 356.82  | 99.34   | 298.83   | 1.58887                | 0.00395 |
| hsa-miR-7845-5p  | MIMAT0030420 | 337.57                           | 227.91  | 259.49  | 245.72  | 927.72        | 594.73   | 411.61  | 614.45  | 267.67  | 637.13   | 1.25111                | 0.00419 |
| hsa-miR-572      | MIMAT0003237 | 37.07                            | 34.18   | 48.06   | 39.49   | 66.87         | 203.82   | 104.32  | 127.33  | 39.70   | 125.58   | 1.66137                | 0.00429 |
| hsa-miR-4648     | MIMAT0019710 | 392.00                           | 150.57  | 208.89  | 158.09  | 623.23        | 848.26   | 544.90  | 478.08  | 227.39  | 623.62   | 1.45551                | 0.00554 |
| hsa-miR-6768-5p  | MIMAT0027436 | 5260.05                          | 2163.06 | 2342.67 | 3798.79 | 17783.43      | 10159.78 | 6972.87 | 8523.06 | 3391.14 | 10859.79 | 1.67915                | 0.00701 |
| hsa-miR-4459     | MIMAT0018981 | 1162.11                          | 483.58  | 603.87  | 675.18  | 3023.36       | 2314.93  | 1342.59 | 1594.85 | 731.19  | 2068.93  | 1.50058                | 0.00708 |
| hsa-miR-1303     | MIMAT0005891 | 34.22                            | 22.27   | 31.12   | 36.59   | 117.67        | 57.24    | 52.66   | 70.23   | 31.05   | 74.45    | 1.26179                | 0.00737 |

|                 |              |         |         |         |         |          |         |         |         |         |         |          |         |
|-----------------|--------------|---------|---------|---------|---------|----------|---------|---------|---------|---------|---------|----------|---------|
| hsa-miR-6834-5p | MIMAT0027568 | 59.18   | 29.36   | 45.23   | 42.41   | 130.84   | 81.88   | 70.28   | 92.48   | 44.04   | 93.87   | 1.09171  | 0.00816 |
| hsa-miR-6076    | MIMAT0023701 | 325.43  | 170.62  | 158.29  | 179.12  | 1028.07  | 608.82  | 366.96  | 434.42  | 208.37  | 609.57  | 1.54866  | 0.01021 |
| hsa-miR-4476    | MIMAT0019003 | 195.38  | 77.25   | 166.90  | 118.10  | 271.91   | 343.25  | 349.09  | 243.08  | 139.41  | 301.83  | 1.11444  | 0.01058 |
| hsa-miR-4741    | MIMAT0019871 | 2781.13 | 1356.96 | 1694.69 | 2238.50 | 6566.13  | 3607.55 | 3194.27 | 4763.33 | 2017.82 | 4532.82 | 1.16761  | 0.01146 |
| hsa-miR-4792    | MIMAT0019964 | 342.66  | 129.66  | 173.46  | 184.91  | 623.36   | 479.75  | 360.88  | 391.70  | 207.67  | 463.92  | 1.15958  | 0.01188 |
| hsa-miR-769-3p  | MIMAT0003887 | 33.39   | 20.38   | 30.49   | 42.36   | 100.92   | 62.68   | 44.79   | 100.25  | 31.66   | 77.16   | 1.28540  | 0.01306 |
| hsa-miR-6132    | MIMAT0024616 | 475.35  | 358.38  | 268.83  | 426.25  | 483.16   | 1911.31 | 1204.36 | 1151.38 | 382.20  | 1187.55 | 1.63558  | 0.01552 |
| hsa-miR-4530    | MIMAT0019069 | 1339.49 | 728.85  | 1321.09 | 845.01  | 3053.78  | 2412.51 | 1482.36 | 1872.33 | 1058.61 | 2205.25 | 1.05877  | 0.01589 |
| hsa-miR-5587-3p | MIMAT0022290 | 30.99   | 15.23   | 27.53   | 21.17   | 32.27    | 70.70   | 45.52   | 51.23   | 23.73   | 49.93   | 1.07326  | 0.01689 |
| hsa-miR-204-3p  | MIMAT0022693 | 2378.08 | 1015.03 | 5619.80 | 2928.33 | 7454.94  | 9061.63 | 9099.29 | 7129.50 | 2985.31 | 8186.34 | 1.45534  | 0.01689 |
| hsa-miR-4294    | MIMAT0016849 | 6248.65 | 1749.86 | 2355.98 | 2693.56 | 14962.77 | 7984.00 | 6138.79 | 7293.16 | 3262.01 | 9094.68 | 1.47926  | 0.01761 |
| hsa-miR-30b-3p  | MIMAT0004589 | 43.91   | 13.82   | 11.98   | 28.74   | 109.69   | 65.20   | 49.22   | 54.95   | 24.61   | 69.77   | 1.50298  | 0.01879 |
| hsa-miR-15b-5p  | MIMAT0000417 | 41.06   | 73.45   | 40.97   | 30.27   | 190.25   | 99.72   | 73.65   | 89.10   | 46.44   | 113.18  | 1.28531  | 0.01948 |
| hsa-miR-3127-5p | MIMAT0014990 | 16.76   |         | 11.45   | 11.84   | 38.56    | 22.72   | 19.15   | 30.61   | 13.35   | 27.76   | 1.05630  | 0.01965 |
| hsa-let-7i-5p   | MIMAT0000415 | 9.71    | 15.54   | 8.20    | 5.89    | 34.12    | 22.47   | 16.41   | 16.31   | 9.83    | 22.33   | 1.18283  | 0.02038 |
| hsa-miR-575     | MIMAT0003240 | 209.42  | 57.13   | 148.68  | 115.17  | 766.21   | 389.09  | 210.60  | 382.08  | 132.60  | 436.99  | 1.72056  | 0.02050 |
| hsa-miR-6889-5p | MIMAT0027678 | 725.84  | 274.98  | 275.88  | 331.44  | 1253.14  | 899.72  | 643.90  | 740.65  | 402.03  | 884.35  | 1.13731  | 0.02096 |
| hsa-miR-4505    | MIMAT0019041 | 846.29  | 548.51  | 469.17  | 623.89  | 743.73   | 2132.86 | 1242.16 | 1512.25 | 621.96  | 1407.75 | 1.17849  | 0.02254 |
| hsa-miR-1287-5p | MIMAT0005878 | 4.95    |         | 5.18    | 7.50    | 16.28    | 12.39   | 7.51    | 13.41   | 5.88    | 12.40   | 1.07669  | 0.02283 |
| hsa-miR-6799-5p | MIMAT0027498 | 1192.15 | 382.64  | 505.90  | 632.82  | 2629.28  | 1504.55 | 1094.47 | 1335.01 | 678.38  | 1640.83 | 1.27426  | 0.02393 |
| hsa-miR-4733-3p | MIMAT0019858 | 26.25   | 11.25   | 58.29   | 43.92   | 63.86    | 117.19  | 99.31   | 97.91   | 34.93   | 94.57   | 1.43691  | 0.02477 |
| hsa-miR-331-5p  | MIMAT0004700 |         | 11.92   | 11.38   | 8.98    | 3.22     |         | 5.46    |         | 10.76   | 4.34    | -1.30972 | 0.02603 |
| hsa-miR-433-5p  | MIMAT0026554 | 30.79   | 12.23   | 14.09   | 22.00   | 146.11   | 45.81   | 35.23   | 42.84   | 19.78   | 67.50   | 1.77109  | 0.02754 |
| hsa-miR-6075    | MIMAT0023700 | 499.92  | 384.88  | 380.83  | 459.16  | 487.88   | 1374.86 | 743.36  | 890.61  | 431.20  | 874.18  | 1.01958  | 0.02851 |
| hsa-miR-4740-3p | MIMAT0019870 | 118.26  | 41.95   | 62.39   | 60.49   | 357.49   | 144.87  | 111.85  | 139.62  | 70.77   | 188.46  | 1.41302  | 0.03080 |
| hsa-miR-566     | MIMAT0003230 | 8.55    |         | 13.27   | 6.47    | 13.10    | 25.69   | 17.99   | 18.66   | 9.43    | 18.86   | 1.00040  | 0.03117 |
| hsa-miR-1202    | MIMAT0005865 | 393.79  | 154.46  | 244.75  | 247.05  | 1344.20  | 529.77  | 383.64  | 491.35  | 260.01  | 687.24  | 1.40224  | 0.03617 |
| hsa-miR-1343-5p | MIMAT0027038 | 5271.27 | 2472.80 | 2997.05 | 4726.10 | 17197.72 | 6993.22 | 5187.93 | 8411.36 | 3866.80 | 9447.56 | 1.28880  | 0.03656 |
| hsa-miR-6734-5p | MIMAT0027369 | 34.54   | 14.55   | 15.47   | 18.49   | 72.62    | 42.35   | 28.97   | 32.41   | 20.76   | 44.09   | 1.08634  | 0.03886 |

|                 |              |        |        |        |        |         |        |        |        |        |         |          |         |
|-----------------|--------------|--------|--------|--------|--------|---------|--------|--------|--------|--------|---------|----------|---------|
| hsa-miR-1273d   | MIMAT0015090 | 4.84   | 8.10   | 7.59   | 7.53   | 26.41   | 12.23  | 7.79   | 17.17  | 7.02   | 15.90   | 1.18053  | 0.04062 |
| hsa-miR-5585-3p | MIMAT0022286 | 201.59 | 61.29  | 73.91  | 205.49 | 609.75  | 215.90 | 221.01 | 437.78 | 135.57 | 371.11  | 1.45279  | 0.04301 |
| hsa-miR-1275    | MIMAT0005929 | 835.45 | 212.23 | 351.71 | 404.66 | 2302.14 | 954.17 | 655.41 | 910.82 | 451.01 | 1205.64 | 1.41855  | 0.04462 |
| hsa-miR-186-3p  | MIMAT0004612 | 14.31  |        | 6.71   | 4.93   | 13.47   | 22.14  | 19.19  | 14.86  | 8.65   | 17.41   | 1.00935  | 0.04608 |
| hsa-miR-4746-5p | MIMAT0019880 | 20.84  |        | 13.00  | 29.34  | 11.08   | 4.59   | 6.65   | 12.94  | 21.06  | 8.82    | -1.25632 | 0.04765 |
| hsa-miR-125a-3p | MIMAT0004602 | 83.05  | 43.42  | 40.06  | 29.82  | 196.71  | 95.27  | 72.54  | 73.57  | 49.09  | 109.52  | 1.15775  | 0.04849 |
| hsa-miR-223-3p  | MIMAT0000280 | 112.86 | 44.32  | 162.24 | 46.86  | 198.22  | 354.04 | 219.22 | 118.65 | 91.57  | 222.53  | 1.28110  | 0.04901 |

# Supplementary figure S1

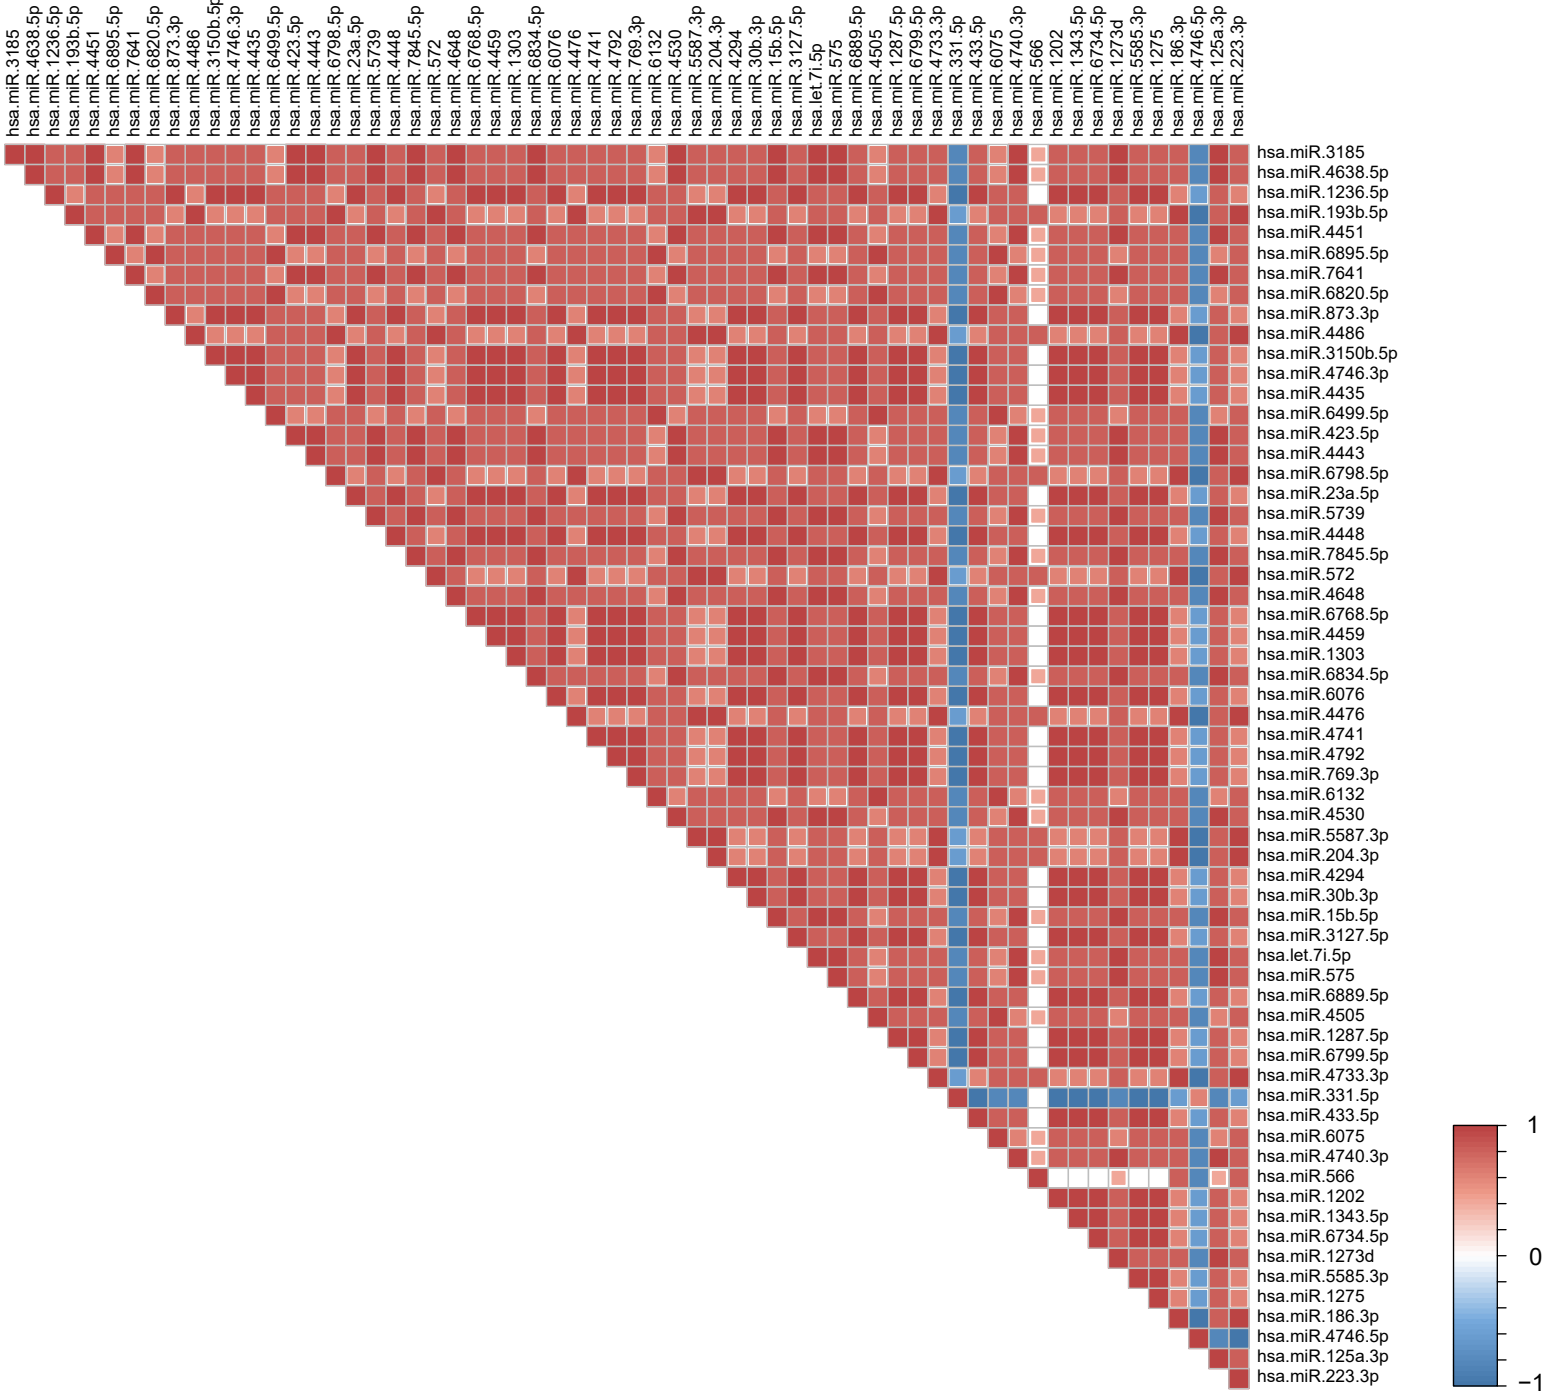

Supplement: MOESM1 [file 16373776]
